# Supplementary material for: All-in-one NMR spectroscopy of small organic molecules: complete chemical shift assignment from a single NMR experiment
Source: Royal Society of Chemistry journal article supplement (doi:10.1039/d0ra03417g), 2020-01-01
Supplement: d0ra03417g1.pdf [file d0ra03417g1.pdf]

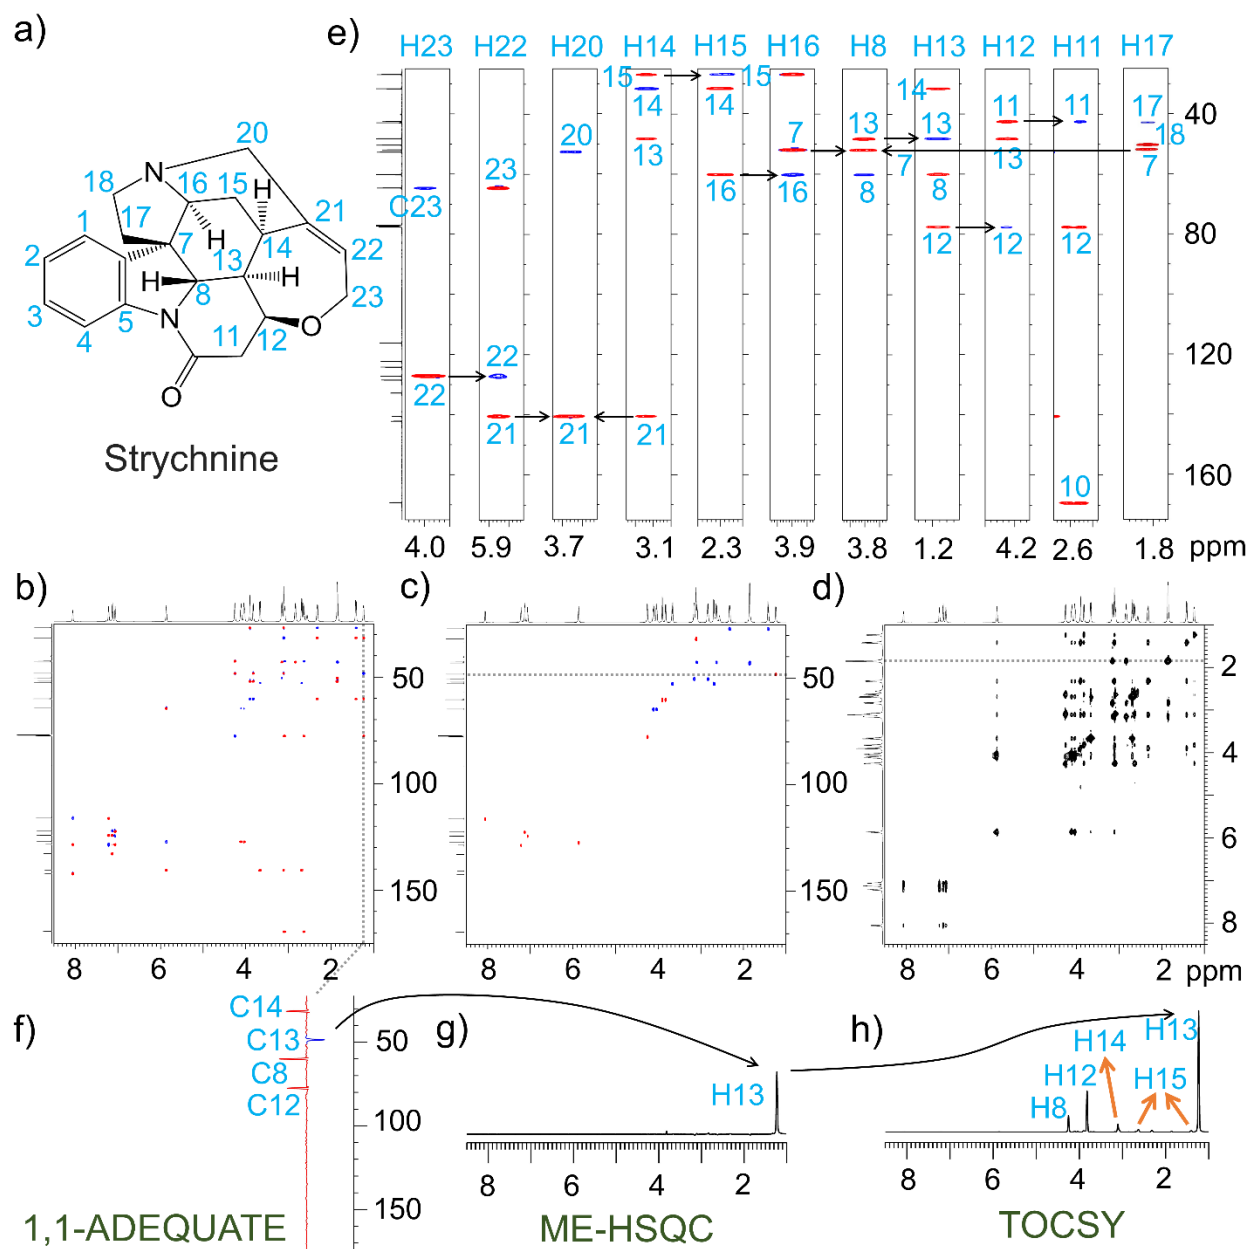

**Figure S1:** 1,1-ADEQUATE (b, e, f), ME-HSQC (c, g), and TOCSY (d, h) spectra obtained from a single NOAH-AST recorded on strychnine (a) molecule (~180 mM), using an 800 MHz magnetic field strength.

### NOAH-AST<sub>PS</sub> - Uniformly Sampled, ~ 8 hours

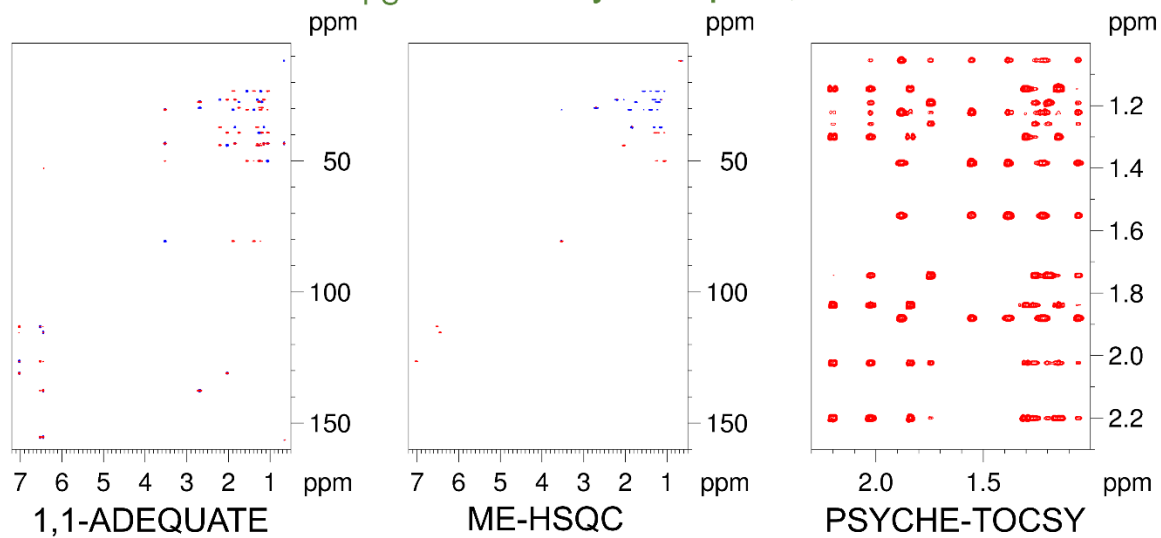

### NOAH-AST<sub>PS</sub> - Non-Uniformly Sampled, ~ 2 hours

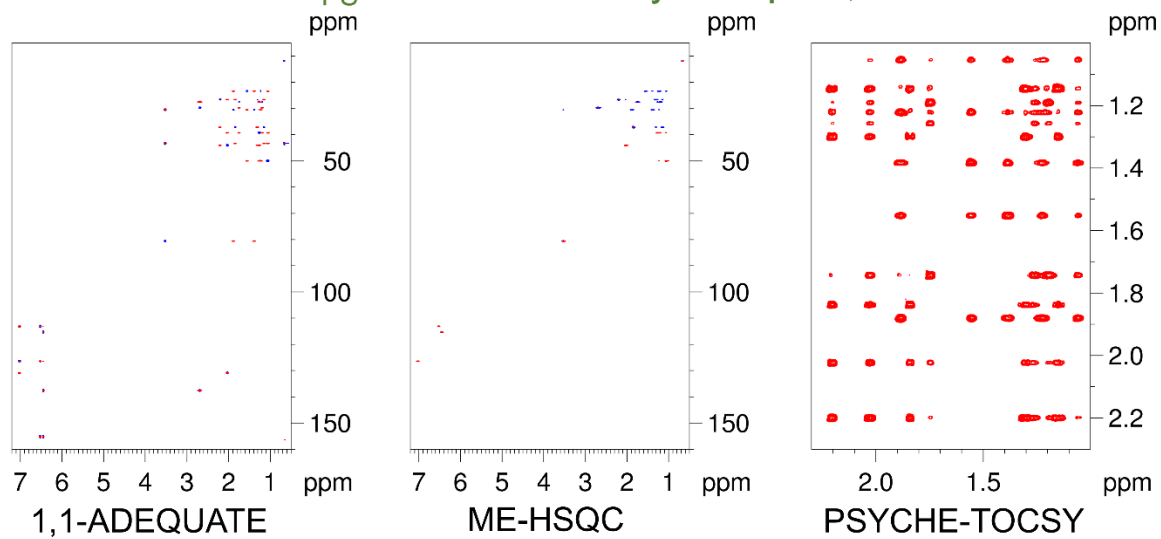

**Figure S2:** 1,1-ADEQUATE, ME-HSQC, and PSYCHE-TOCSY spectra obtained from a single NOAH-AST<sub>PS</sub> recorded on estradiol molecule in uniformly sampled (upper, ~ 7 hours 15 min), and NUS modes (lower, ~ 1 hour 50 min) using an 800 MHz magnetic field strength.

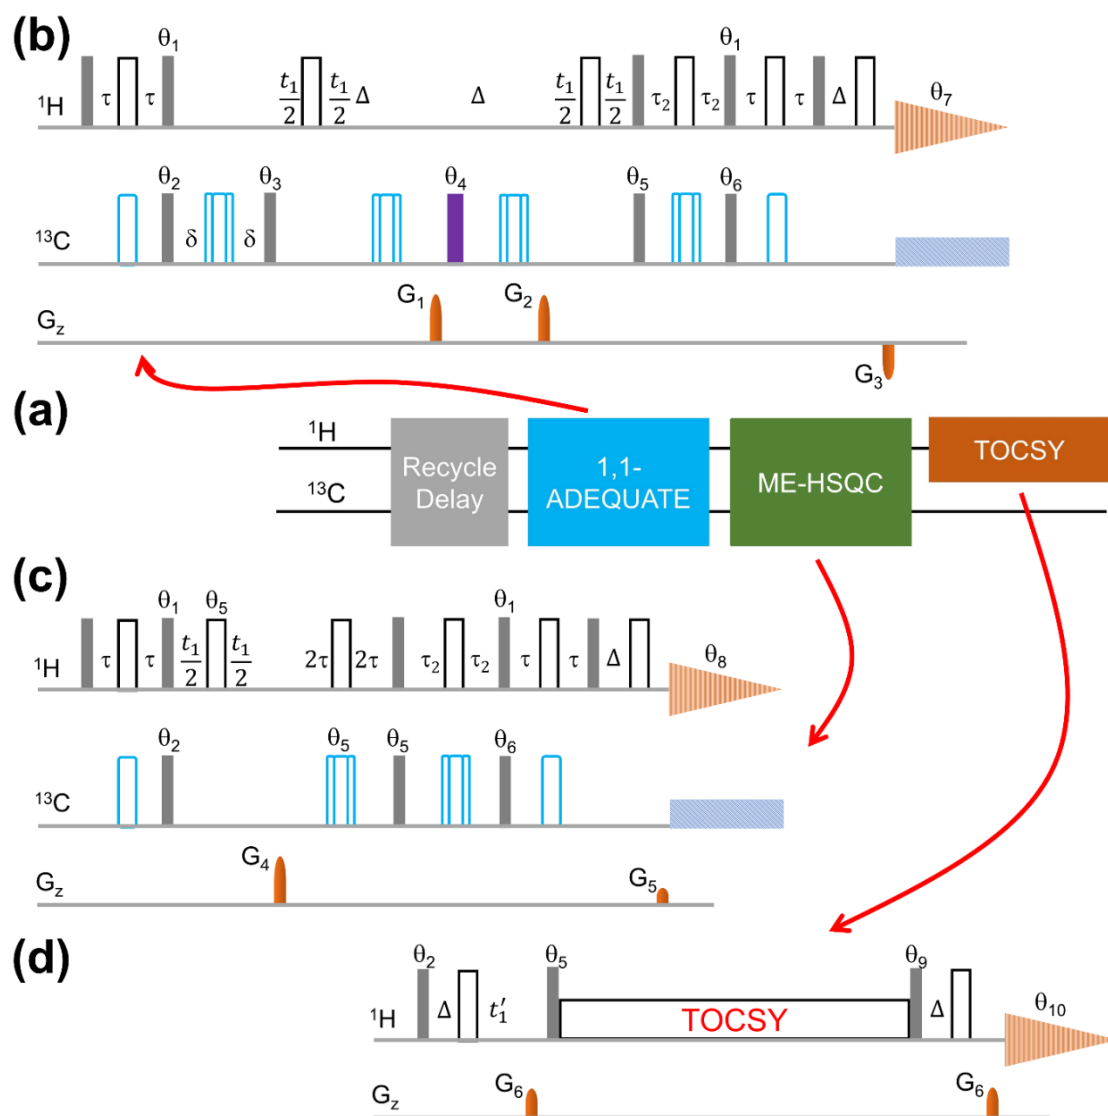

**Figure S3:** Schematic of NOAH-AST pulse sequence (a). The 1,1-ADEQUATE, ME-HSQC, and TOCSY pulse modules are shown in (b), (c), and (d), respectively. On both the frequency channels filled and open rectangles, respectively represent the  $90^\circ$ , and  $180^\circ$  pulses. All the  $180^\circ$  pulses (open blue bars) on  $^{13}\text{C}$  channel are the adiabatic pulses (0.5 ms), whereas composite pulses (2 ms) are depicted with blue bars in 1:2:1 ratio. Phases of pulses:  $\theta_1=y$ ;  $\theta_2=x, -x$ ;  $\theta_3=x, x, x, x, -x, -x, -x, -x$ ;  $\theta_4=x, x, x, x, x, x, x, -x, -x, -x, -x, -x, -x, -x$ ;  $\theta_5=x, x, -x, -x$ ;  $\theta_6=y, y, -y, -y$ ;  $\theta_7=x, -x, -x, x, -x, x, x, -x, -x, x, x, -x, x, -x, x$ ;  $\theta_8=-x, x, x, -x$ ;  $\theta_9=-x, -x, x, x$ ;  $\theta_{10}=x, -x$ ; remaining all the pulses are applied along the x-axis. Delays:  $\tau=1/(4^*J_{\text{CH}})$ ;  $\delta=1/(4^*J_{\text{CC}})$ ;  $\Delta=1.2$  ms;  $\tau_2=1/(8^*J_{\text{CH}})$ ;  $t'_1 = \left( \frac{SW_{^{13}\text{C}}}{SW_{^1\text{H}}} \right) t_1$  (where SW presents the spectral-width). Gradients (1 ms duration at a maximum 53.5 G/cm):  $G_1= +78.5\%$ ;  $G_2= +77.6\%$ ;  $G_3= -59\%$ ;  $G_4= +80.0\%$ ;  $G_5= +20.1\%$ ;  $G_6= +30.0\%$ .

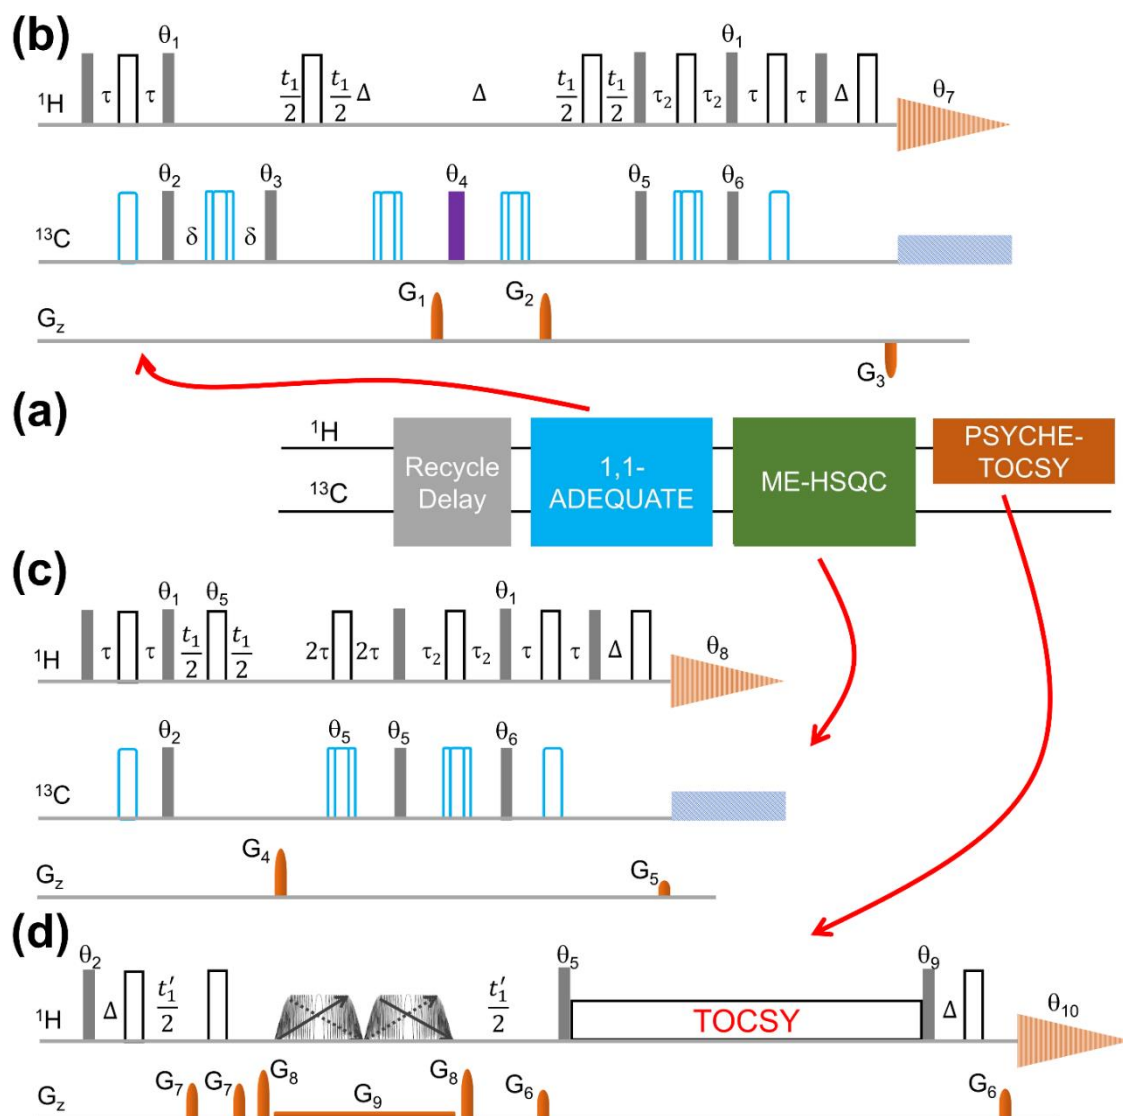

**Figure S4:** Schematic of NOAH-AST<sub>PS</sub> pulse sequence (a). The 1,1-ADEQUATE, ME-HSQC, and PSYCHE-TOCSY pulse modules are shown in (b), (c), and (d), respectively. On both the frequency channels filled and open rectangles, respectively represent the 90°, and 180° pulses. All the 180° pulses (open blue bars) on  $^{13}\text{C}$  channel are the adiabatic pulses (0.5 ms), whereas composite pulses (2 ms) are depicted with blue bars in 1:2:1 ratio. Trapezoids with arrows represent the PSYCHE pulse (30 ms). Phases of pulses:  $\theta_1=y$ ;  $\theta_2=x, -x$ ;  $\theta_3=x, x, x, x, -x, -x, -x, -x$ ;  $\theta_4=x, x, x, x, x, x, x, x, -x, -x, -x, -x, -x, -x, -x, -x$ ;  $\theta_5=x, x, -x, -x$ ;  $\theta_6=y, y, -y, -y$ ;  $\theta_7= x, -x, -x, x, -x, x, x, -x, -x, x, x, -x, x, -x, x, -x, x$ ;  $\theta_8= -x, x, x, -x$ ;  $\theta_9= -x, -x, x, x$ ;  $\theta_{10}= x, -x$ ; remaining all the pulses are applied along the x-axis. Delays:  $\tau=1/(4 \cdot J_{\text{CH}})$ ;  $\delta=1/(4 \cdot J_{\text{CC}})$ ;  $\Delta=1.2$  ms;  $\tau_2=1/(8 \cdot J_{\text{CH}})$ ;  $t_1' = \left( \frac{SW_{^{13}\text{C}}}{SW_{^1\text{H}}} \right) t_1$  (where SW presents the spectral-width). Gradients (1 ms duration at a maximum 53.5 G/cm, except G9): G1= +78.5%; G2= +77.6%; G3= -59%; G4= +80.0%; G5= +20.1%; G6= +30.0%; G7= +49.0%; G8= +77.0%; G9= +1.0-3.0% (30 ms).

Screenshots of acquisition parameters used to record NOAH-AST<sub>PS</sub> experiments on estradiol sample.

SPECTRUM PROCPPARS **ACQUPARS** TITLE PULSEPROG PEAKS INTEGRALS SAMPLE STRUCTURE PLOT FID

General Channel f1 Channel f2 Gradient channel

General

|               |                  |         |                                                  |
|---------------|------------------|---------|--------------------------------------------------|
| PULPROG       | noah3_AHT_psyche | E       | Pulse program for acquisition                    |
| TD            | 1024             |         | Time domain size                                 |
| SWH [Hz, ppm] | 5263.16          | 6.57868 | Sweep width                                      |
| AQ [sec]      | 0.0972800        |         | Acquisition time                                 |
| RG            | 203              |         | Receiver gain                                    |
| DW [µsec]     | 95.000           |         | Dwell time                                       |
| DE [µsec]     | 12.00            |         | Pre-scan-delay                                   |
| cnst2         | 145.000000       |         | J(CH) = 127 .. 160 Hz                            |
| cnst3         | 45.000000        |         | J(CC) = 35 .. 55 Hz                              |
| CNST10        | 5.9379978        |         | = scaling factor swC/swH for TOCSY               |
| cnst11        | 8.000000         |         | for multiplicity selection = 4 for CH, 8 for CHn |
| cnst17        | -0.500000        |         | = -0.5 for Crp60comp.4                           |
| d0 [sec]      | 0.00000300       |         | Incremented delay (2D) (for adequate)            |
| D1 [sec]      | 1.000000000      |         | Relaxation delay; 1-5 * T1                       |
| d4 [sec]      | 0.00172414       |         | 1/4J(CH)                                         |

SPECTRUM PROCPPARS **ACQUPARS** TITLE PULSEPROG PEAKS INTEGRALS SAMPLE STRUCTURE PLOT FID

General Channel f1 Channel f2 Gradient channel

|               |             |                                          |
|---------------|-------------|------------------------------------------|
| D9 [sec]      | 0.079999998 | TOCSY mixing period                      |
| d10 [sec]     | 0.00000300  | d10=3u                                   |
| d11 [sec]     | 0.03000000  | Delay for disk I/O [30 msec]             |
| d16 [sec]     | 0.00020000  | Delay for homospoil/gradient recovery    |
| d17 [sec]     | 0.00020000  | d17=200u                                 |
| d21 [sec]     | 0.00344800  | d21=0.003448000s                         |
| d23 [sec]     | 0.00555556  | 1/(4J(CC))                               |
| d24 [sec]     | 0.00086207  | 1/(4J(CH)) for CH                        |
| DELTA1 [sec]  | 0.00118150  | DELTA1=p16+d16-p2-d0*2+4u                |
| DELTA10 [sec] | 0.00272550  | DELTA10=d21-cnst17*p24/2-p16-d16-p2-d0*2 |
| DELTA11 [sec] | 0.00121357  | DELTA11=p16+d16-p1*0.78+de+8u            |
| DELTA12 [sec] | 0.00147414  | DELTA12=d4-larger(p2,p14)/2              |
| DELTA13 [sec] | 0.00394400  | DELTA13=d21-cnst17*p24/2-4u              |
| DELTA14 [sec] | 0.00135807  | DELTA14=d24-cnst17*p24/2-4u              |
| DELTA2 [sec]  | 0.00120800  | DELTA2=p16+d16+8u                        |
| DELTA3 [sec]  | 0.00121850  | DELTA3=p16+d16+p2+d0*2-4u                |
| DELTA4 [sec]  | 0.00147014  | DELTA4=d4-p14/2-4u                       |

SPECTRUM PROCPARS **ACQPARS** TITLE PULSEPROG PEAKS INTEGRALS SAMPLE STRUCTURE PLOT FID

← A ↻ U C ↗

|                  |              |                                          |                                    |
|------------------|--------------|------------------------------------------|------------------------------------|
| General          | DELTA5 [sec] | 0.00455156                               | DELTA5=d23-p24/2-4u                |
| Channel f1       | DELTA6 [sec] | 0.00135807                               | DELTA6=d24-cnst17*p24/2-4u         |
| Channel f2       | DELTA8 [sec] | 0.00120300                               | DELTA8=p16+d16+d0                  |
| Gradient channel | DELTA9 [sec] | 0.00120800                               | DELTA9=p16+d16+8u                  |
|                  | DS           | <input type="text" value="32"/>          | >= 16                              |
|                  | FACTOR1      | 14                                       | FACTOR1=(d9/(p6*115.112))/2        |
|                  | in0 [sec]    | 0.00001600                               | 1/(2 * SW(C)) = DW(C)              |
|                  | in10 [sec]   | 0.00009501                               | in10=0.5*in1*cnst10                |
|                  | INF1 [µsec]  | 32.00                                    | 1/SW(C) = 2 * DW(C)                |
|                  | I0           | 512                                      | I0=td1/6                           |
|                  | I1           | 28                                       | I1=FACTOR1*2                       |
|                  | NBL          | <input type="text" value="3"/>           | Number of blocks of TD size        |
|                  | NS           | <input type="text" value="16"/>          | 16 * n                             |
|                  | ↕ Channel f1 |                                          |                                    |
|                  | SFO1 [MHz]   | <input type="text" value="800.0330713"/> | Frequency of ch. 1                 |
|                  | O1 [Hz, ppm] | <input type="text" value="3071.32"/>     | <input type="text" value="3.839"/> |

< >

SPECTRUM PROCPARS **ACQPARS** TITLE PULSEPROG PEAKS INTEGRALS SAMPLE STRUCTURE PLOT FID

← A ↻ U C ↗

|                  |               |                                            |                                        |                                                    |
|------------------|---------------|--------------------------------------------|----------------------------------------|----------------------------------------------------|
| General          | O1 [Hz, ppm]  | <input type="text" value="3071.32"/>       | <input type="text" value="3.839"/>     | Frequency of ch. 1                                 |
| Channel f1       | NUC1          | 1H                                         | <input type="button" value="Edit..."/> | Nucleus for channel 1                              |
| Channel f2       | CNST20        | <input type="text" value="15.0000000"/>    |                                        | = low flip angle pulse 10-25 degree                |
| Gradient channel | cnst21        | 10000.000000                               |                                        | cnst21=10000                                       |
|                  | cnst31        | 396694.187500                              |                                        | cnst31= (p30/p1) * (p30/p1)                        |
|                  | cnst50        | 48.112522                                  |                                        | cnst50=(cnst20/360)*sqrt((2*cnst21)/(p10/2000000)) |
|                  | P1 [µsec]     | <input type="text" value="8.250"/>         |                                        | F1 channel - 90 degree high power pulse            |
|                  | p2 [µsec]     | 16.50                                      |                                        | F1 channel - 180 degree high power pulse           |
|                  | p6 [µsec]     | 25.00                                      |                                        | p6=25u                                             |
|                  | p10 [µsec]    | 30000.00                                   |                                        | p10=30m                                            |
|                  | p28 [µsec]    | 0                                          |                                        | p28=0u                                             |
|                  | p30 [µsec]    | 5196.15                                    |                                        | p30=1000000.0/(cnst50*4)                           |
|                  | PLW1 [W, dB]  | <input type="text" value="10.186"/>        | <input type="text" value="-10.08"/>    | F1 channel - power level for pulse (default)       |
|                  | PLW10 [W, dB] | <input type="text" value="1.1092"/>        | <input type="text" value="-0.45"/>     | Power PLW10                                        |
|                  | SPNAM 37      | <input type="text" value="Crp_psyche.20"/> | <input type="button" value="..."/>     | <input type="text" value="Crp_psyche.20"/>         |
|                  | SPOAL37       | <input type="text" value="0.500"/>         |                                        | Phase alignment of freq. offset in SP37            |
|                  | SPOFFS37 [Hz] | <input type="text" value="0"/>             |                                        | Offset frequency for SP37                          |

< >

SPECTRUM PROCPARS **ACQUPARS** TITLE PULSEPROG PEAKS INTEGRALS SAMPLE STRUCTURE PLOT FID

← A C

General Channel f2

|                  |              |                 |                    |                                                      |                    |
|------------------|--------------|-----------------|--------------------|------------------------------------------------------|--------------------|
| Channel f1       | SFO2 [MHz]   | 201.1846121     | Frequency of ch. 2 |                                                      |                    |
| Channel f2       | O2 [Hz, ppm] | 16908.55        | 84.052             | Frequency of ch. 2                                   |                    |
| Gradient channel | NUC2         | 13C             | Edit...            | Nucleus for channel 2                                |                    |
|                  | CPDPRG 2     | bj_p5m4sp_4sp.2 | ...                | E                                                    | File name for cpd2 |
|                  | p0 [µsec]    | 20.00           |                    | F2 channel - 120 degree high power pulse             |                    |
|                  | P3 [µsec]    | 15.000          |                    | F2 channel - 90 degree high power pulse              |                    |
|                  | p14 [µsec]   | 500.00          |                    | F2 channel - 180 degree shaped pulse for inversion   |                    |
|                  | p24 [µsec]   | 2000.00         |                    | F2 channel - 180 degree shaped pulse for refocussing |                    |
|                  | p63 [µsec]   | 1500.00         |                    | F2 channel - decoupler pulse length [1.5 msec]       |                    |
|                  | PLW0 [W]     | 0               |                    | 0W                                                   |                    |
|                  | PLW2 [W]     | 141.04          |                    | F2 channel - power level for pulse (default)         |                    |
|                  | PLW12 [W]    | 9.6108          |                    | F2 channel - power level for CPD/BB decoupling       |                    |
|                  | SPNAM 3      | Crp80,0.5,20.1  | ...                | E                                                    | Crp80,0.5,20.1     |
|                  | SPOAL3       | 0.500           |                    | Phase alignment of freq. offset in SP3               |                    |
|                  | SPOFFS3 [Hz] | 0               |                    | Offset frequency for SP3                             |                    |
|                  | SPW3 [W]     | 64.647          |                    | F2 channel - shaped pulse (180degree inversion)      |                    |

SPECTRUM PROCPARS **ACQUPARS** TITLE PULSEPROG PEAKS INTEGRALS SAMPLE STRUCTURE PLOT FID

← A C

General

|                  |               |                |     |                                                   |                    |
|------------------|---------------|----------------|-----|---------------------------------------------------|--------------------|
|                  | SPNAM 7       | Crp80comp.4    | ... | E                                                 | Crp80comp.4        |
| Channel f1       | SPOAL7        | 0.500          |     | Phase alignment of freq. offset in SP7            |                    |
| Channel f2       | SPOFFS7 [Hz]  | 0              |     | Offset frequency for SP7                          |                    |
| Gradient channel | SPW7 [W]      | 64.647         |     | F2 channel - shaped pulse (180degree refocussing) |                    |
|                  | SPNAM 14      | Crp48,1.5,20.2 | ... | E                                                 | File name for SP14 |
|                  | SPOAL14       | 0.500          |     | Phase alignment of freq. offset in SP14           |                    |
|                  | SPOFFS14 [Hz] | 0              |     | Offset frequency for SP14                         |                    |
|                  | SPW14 [W]     | 31.031         |     | Shaped pulse power SPW14                          |                    |
|                  | SPNAM 31      | Crp48,1.5,20.2 | ... | E                                                 | File name for SP31 |
|                  | SPOAL31       | 0.500          |     | Phase alignment of freq. offset in SP31           |                    |
|                  | SPOFFS31 [Hz] | 0              |     | Offset frequency for SP31                         |                    |
|                  | SPW31 [W]     | 7.7577         |     | Shaped pulse power SPW31                          |                    |

Gradient channel

|  |          |            |     |        |            |
|--|----------|------------|-----|--------|------------|
|  | GPNAM 1  | SMSQ10.100 | ... | E      | SMSQ10.100 |
|  | GPZ1 [%] | 78.50      |     | +78.5% |            |
|  | GPNAM 2  | SMSQ10.100 | ... | E      | SMSQ10.100 |

| SPECTRUM PROCNAPS |           | ACQUPARS   | TITLE | PULSEPROG | PEAKS | INTEGRALS | SAMPLE | STRUCTURE | PLOT | FID       |
|-------------------|-----------|------------|-------|-----------|-------|-----------|--------|-----------|------|-----------|
| General           | GPNAM 1   | SMSQ10.100 |       |           |       |           |        |           |      |           |
| Channel f1        | GPZ1 [%]  | 78.50      |       |           |       |           |        |           |      | +78.5%    |
| Channel f2        | GPNAM 2   | SMSQ10.100 |       |           |       |           |        |           |      |           |
| Gradient channel  | GPZ2 [%]  | 77.60      |       |           |       |           |        |           |      | +77.6%    |
|                   | GPNAM 3   | SMSQ10.100 |       |           |       |           |        |           |      |           |
|                   | GPZ3 [%]  | -59.00     |       |           |       |           |        |           |      | -59%      |
|                   | GPNAM 4   | SMSQ10.100 |       |           |       |           |        |           |      |           |
|                   | GPZ4 [%]  | 80.00      |       |           |       |           |        |           |      | +80.0%    |
|                   | GPNAM 5   | SMSQ10.100 |       |           |       |           |        |           |      |           |
|                   | GPZ5 [%]  | 20.10      |       |           |       |           |        |           |      | +20.1%    |
|                   | GPNAM 10  | RECT.1     |       |           |       |           |        |           |      |           |
|                   | GPZ10 [%] | 3.00       |       |           |       |           |        |           |      | +1.0-3.0% |
|                   | GPNAM 11  | SMSQ10.100 |       |           |       |           |        |           |      |           |
|                   | GPZ11 [%] | 49.00      |       |           |       |           |        |           |      | +49%      |
|                   | GPNAM 12  | SMSQ10.100 |       |           |       |           |        |           |      |           |
|                   | GPZ12 [%] | 77.00      |       |           |       |           |        |           |      | 77%       |

| SPECTRUM PROCNAPS |            | ACQUPARS   | TITLE | PULSEPROG | PEAKS | INTEGRALS | SAMPLE | STRUCTURE | PLOT | FID                      |
|-------------------|------------|------------|-------|-----------|-------|-----------|--------|-----------|------|--------------------------|
|                   | GPZ4 [%]   | 80.00      |       |           |       |           |        |           |      | +80.0%                   |
| General           | GPNAM 5    | SMSQ10.100 |       |           |       |           |        |           |      |                          |
| Channel f1        | GPZ5 [%]   | 20.10      |       |           |       |           |        |           |      | +20.1%                   |
| Channel f2        | GPNAM 10   | RECT.1     |       |           |       |           |        |           |      |                          |
| Gradient channel  | GPZ10 [%]  | 3.00       |       |           |       |           |        |           |      | +1.0-3.0%                |
|                   | GPNAM 11   | SMSQ10.100 |       |           |       |           |        |           |      |                          |
|                   | GPZ11 [%]  | 49.00      |       |           |       |           |        |           |      | +49%                     |
|                   | GPNAM 12   | SMSQ10.100 |       |           |       |           |        |           |      |                          |
|                   | GPZ12 [%]  | 77.00      |       |           |       |           |        |           |      | 77%                      |
|                   | GPNAM 13   | SMSQ10.100 |       |           |       |           |        |           |      |                          |
|                   | GPZ13 [%]  | 30.00      |       |           |       |           |        |           |      | 30%                      |
|                   | GPNAM 14   | SMSQ10.100 |       |           |       |           |        |           |      |                          |
|                   | GPZ14 [%]  | 30.00      |       |           |       |           |        |           |      | 30%                      |
|                   | GPNAM 22   | SMSQ10.100 |       |           |       |           |        |           |      | File name for gp22       |
|                   | GPZ22 [%]  | 17.00      |       |           |       |           |        |           |      | 17%                      |
|                   | p16 [µsec] | 1000.00    |       |           |       |           |        |           |      | Homospoil/gradient pulse |
|                   | p17 [µsec] | 1000.00    |       |           |       |           |        |           |      | Homospoil/gradient pulse |



### Experimental parameters used to record NOAH-AST spectra on artemisinin molecule

20 mg of compound dissolved in 0.5 ml of DMSO-D<sub>6</sub>: ~ 140 mM

Number of scans: 32

Recycle delay: 1s

TOCSY mixing time: 80 ms

SW<sub>13C</sub>/ SW<sub>1H</sub>: 7.74

Total experimental time: 7 hr 11 min

| Parameter                          | F2    | F1                      |
|------------------------------------|-------|-------------------------|
| Size of FID                        | 1024  | 1536 (for three blocks) |
| Spectral width (Hz)                | 4425  | 34250                   |
| Acquisition time (s)               | 0.116 | 0.0224                  |
| FID resolution (Hz)                | 8.64  | 44.6                    |
| Transmitter Frequency offset (ppm) | 3.509 | 93.555                  |

### Experimental parameters used to record NOAH-AST spectra on strychnine molecule

30 mg of compound dissolved in 0.5 ml of CDCl<sub>3</sub>: ~ 180 mM

Number of scans: 16

Recycle delay: 1s

TOCSY mixing time: 80 ms

SW<sub>13C</sub>/ SW<sub>1H</sub>: 4.21

Total experimental time: 1 hr 45 min

| Parameter                          | F2    | F1                     |
|------------------------------------|-------|------------------------|
| Size of FID                        | 2048  | 768 (for three blocks) |
| Spectral width (Hz)                | 11904 | 31185                  |
| Acquisition time (s)               | 0.086 | 0.0123                 |
| FID resolution (Hz)                | 11.6  | 81.2                   |
| Transmitter Frequency offset (ppm) | 4.178 | 100.0                  |

### Experimental parameters used to record NOAH-AST spectra on estradiol molecule

50 mg of compound dissolved in 0.5 ml of DMSO-D<sub>6</sub>: ~ 370 mM

Number of scans: 16

Recycle delay: 1s

TOCSY mixing time: 80 ms

SW<sub>13C</sub>/ SW<sub>1H</sub>: 5.94

Total experimental time: ~ 7 hours 4 min

| <b>Parameter</b>                          | <b>F2</b> | <b>F1</b>               |
|-------------------------------------------|-----------|-------------------------|
| <b>Size of FID</b>                        | 1024      | 3072 (for three blocks) |
| <b>Spectral width (Hz)</b>                | 5263      | 31252                   |
| <b>Acquisition time (s)</b>               | 0.097     | 0.049                   |
| <b>FID resolution (Hz)</b>                | 10.28     | 20.35                   |
| <b>Transmitter Frequency offset (ppm)</b> | 3.839     | 84.05                   |

## Experimental parameters used to record NOAH-AST<sub>PS</sub> spectra on estradiol molecule

Number of scans: 16

Recycle delay: 1s

TOCSY mixing time: 80 ms

SW<sub>13C</sub>/ SW<sub>1H</sub> : 5.94

PSYCHE pulse duration and  $\beta$ -angle: 30 ms/ 15°

Total experimental time: ~ 7 hours 15 min

| Parameter                          | F2    | F1                      |
|------------------------------------|-------|-------------------------|
| Size of FID                        | 1024  | 3072 (for three blocks) |
| Spectral width (Hz)                | 5263  | 31252                   |
| Acquisition time (s)               | 0.097 | 0.049                   |
| FID resolution (Hz)                | 10.28 | 20.35                   |
| Transmitter Frequency offset (ppm) | 3.839 | 84.05                   |

## Experimental parameters used to record NUS-NOAH-AST<sub>PS</sub> spectra on estradiol molecule

Number of scans: 16

Recycle delay: 1s

TOCSY mixing time: 80 ms

SW<sub>13C</sub>/ SW<sub>1H</sub> : 5.94

PSYCHE pulse duration and  $\beta$ -angle: 30 ms/ 15°

Total experimental time: ~ 1 hour 50 min

| Parameter                          | F2    | F1                          |
|------------------------------------|-------|-----------------------------|
| Size of FID                        | 1024  | 768 (25%, for three blocks) |
| Spectral width (Hz)                | 5263  | 31252                       |
| Acquisition time (s)               | 0.097 | 0.049                       |
| FID resolution (Hz)                | 10.28 | 20.35                       |
| Transmitter Frequency offset (ppm) | 3.839 | 84.05                       |

NUS sampling setting-up is performed with the python script “noah\_nus.py”

**Experimental parameters used to record NOAH-AST spectra on mixture of D-glucose and D-xylose**

10 mg of D-Glucose and 0.5 mg of D-Xylose are dissolved in 0.5 ml of D<sub>2</sub>O: ~ 110 mM + 6 mM

Number of scans: 16

Recycle delay: 1s

TOCSY mixing time: 80 ms

SW<sub>13C</sub>/ SW<sub>1H</sub>: 2.52

Total experimental time: ~ 1 hour 40 min

| <b>Parameter</b>                          | <b>F2</b> | <b>F1</b>              |
|-------------------------------------------|-----------|------------------------|
| <b>Size of FID</b>                        | 1024      | 768 (for three blocks) |
| <b>Spectral width (Hz)</b>                | 6250      | 10000                  |
| <b>Acquisition time (s)</b>               | 0.082     | 0.038                  |
| <b>FID resolution (Hz)</b>                | 12.2      | 26.04                  |
| <b>Transmitter Frequency offset (ppm)</b> | 4.7       | 80.3                   |

## Data processing

Individual spectra from NOAH-AST and NOAH-AST<sub>PS</sub> experiments have been separated out by using a topspin 4.0.5 inbuilt AU macro “splitx\_au”. In this regard, the user parameters have been used as follows,

USERP1 → noah\_hsqc

USERP2 → noah\_hsqc

USERP3 → noah\_noesy

The following noah-ast.py and noah-ast\_psyche.py scripts have to be copied into the folder  
“C:\Bruker\Topspin4.0.X\exp\stan\nmr\py\user”

Otherwise the following scripts can be obtained from the author.

## NOAH-AST.py script

## save the following script as noah-ast.py

```
MSG("Initial step: 1D 1H and 13C experiments have to be recorded" "\nThen create a new data set with  
the command \a'new'" "\nThe present macro 'AST' takes care all the required parameters")
```

```
ct = XCMD("RPAR HMBCGP all")
```

```
MSG("DRAG 1D 1H data set into the present window" "\nClick on Copy Parameters Option" "\nClick on  
OK")
```

```
ct = XCMD("copypars.py")
```

```
MSG("DRAG 1D 13C data set into the present window" "\nClick on Copy Parameters Option" "\nClick on  
OK")
```

```
ct = XCMD("copypars.py")
```

```
PPTXT = ""
```

```
;$CLASS=HighRes
```

```
;$DIM=2D
```

```
;$TYPE=
```

```
;$SUBTYPE=
```

```
;$COMMENT=
```



```
#include <Avance.incl>
```

```
#include <Delay.incl>
```

```
#include <Grad.incl>
```

```
"p2=p1*2"
```

```
"d0=3u"
```

```
"d10=3u"
```

```
"d11=30m"
```

```
"d16=200u"
```

```
"d17=200u"
```

```
"p28=0u"
```

```
"p14=500u"
```

```
"p24=2000u"
```

```
"p63=1500u"
```

```
"p16=1000u"
```

```
"p17=1000u"
```

```
"p6=25u"
```

```
"cnst2=145"
```

```
"cnst3=45"
```

```
"cnst11=8"
```

```
"cnst17=-0.5"
```

$$p_0 = p_3 * 1.333$$

$$d_4 = 1s / (cnst2 * 4)$$

$$d_{23} = 1s / (cnst3 * 4)$$

$$d_{24} = 1s / (cnst2 * cnst11)$$

$$in_0 = inf1/2$$

$$DELTA1 = p_{16} + d_{16} - p_2 - d_0 * 2 + 4u$$

$$DELTA2 = p_{16} + d_{16} + 8u$$

$$DELTA3 = p_{16} + d_{16} + p_2 + d_0 * 2 - 4u$$

$$DELTA4 = d_4 - p_{14} / 2 - 4u$$

$$DELTA5 = d_{23} - p_{24} / 2 - 4u$$

$$DELTA6 = d_{24} - cnst17 * p_{24} / 2 - 4u$$

$$p_4 = p_3 * 2$$

$$d_{21} = 0.003448000s$$

$$DELTA10 = d_{21} - cnst17 * p_{24} / 2 - p_{16} - d_{16} - p_2 - d_0 * 2$$

$$DELTA11 = p_{16} + d_{16} - p_1 * 0.78 + de + 8u$$

$$DELTA12 = d_4 - \text{larger}(p_2, p_{14}) / 2$$

$$DELTA13 = d_{21} - cnst17 * p_{24} / 2 - 4u$$

$$DELTA14 = d_{24} - cnst17 * p_{24} / 2 - 4u$$

"l0=td1/6"

"FACTOR1=(d9/(p6\*115.112))/2"

"l1=FACTOR1\*2"

"in10=0.5\*inf1\*cnst10"

"p11=20m"

"DELTA8=p16+d16+d0"

"DELTA9=p16+d16+8u"

"acqt0=0"

baseopt\_echo

1 ze

d11 pl12:f2

2 d11

3 4m do:f2

4 50u UNBLKGRAD

d1 st0

4u pl2:f2

4u pl1:f1

4u pl2:f2

(p3 ph1):f2

p16:gp22

d16

13 (p1 ph1)

4u

DELTA4 pl0:f2

(center (p2 ph1) (p14:sp3 ph1):f2 )

4u

DELTA4 pl2:f2

(p1 ph2) (p3 ph4):f2

4u

DELTA5 pl0:f2

(p24:sp7 ph8):f2

4u

DELTA5 pl2:f2

(p3 ph9):f2

d0

(p2 ph1)

d0

DELTA1 pl0:f2

(p24:sp7 ph11):f2

4u

p16:gp1

d16 pl2:f2

(p0 ph10):f2

4u

DELTA3 pl0:f2

(p24:sp7 ph11):f2

p16:gp2

d16 pl2:f2

d0

(p2 ph1)

d0

(center (p1 ph1) (p3 ph5):f2 )

4u

DELTA6 pl0:f2

(center (p2 ph1) (p24:sp7 ph1):f2 )

4u

DELTA6 pl2:f2

(center (p1 ph2) (p3 ph6):f2 )

4u

DELTA4 pl0:f2

(center (p2 ph1) (p14:sp3 ph1):f2 )

4u

DELTA4

(p1 ph1)

DELTA2

(p2 ph1)

4u

p16:gp3\*EA

d16 pl12:f2

4u BLKGRAD

goscnp ph30 cpd2:f2

4u do:f2

2m st

50u UNBLKGRAD

4u pl2:f2

4u pl1:f1

(p3 ph1):f2

p16:gp22

d16

23 (p1 ph21)

DELTA12 pl0:f2

4u

(center (p2 ph21) (p14:sp3 ph26):f2 )

4u

DELTA12 pl2:f2 UNBLKGRAD

p28 ph21

4u

(p1 ph22) (p3 ph23):f2

d0

(p2 ph27)

d0

p16:gp4\*EA

d16

DELTA10 pl0:f2

(center (p2 ph21) (p24:sp7 ph24):f2 )

4u

DELTA13 pl2:f2

(center (p1 ph21) (p3 ph24):f2 )

4u

DELTA14 pl0:f2

(center (p2 ph21) (p24:sp7 ph21):f2 )

4u

DELTA14 pl2:f2

(center (p1 ph22) (p3 ph25):f2 )

DELTA12 pl0:f2

(center (p2 ph21) (p14:sp3 ph21):f2 )

DELTA12

(p1 ph21)

DELTA11

(p2 ph21)

4u

p16:gp5

d16 pl12:f2

4u BLKGRAD

goscnp ph31 cpd2:f2

4u do:f2

2m st

4u pl2:f2

(p3 ph1):f2

50u UNBLKGRAD

p16:gp22

d16

4u pl1:f1

p1 ph12

DELTA8

p2 ph8

d10

d10

p16:gp13\*EA

d16

p1 ph14

10u pl10:f1



;begin DIPSI2

14 p6\*3.556 ph13

p6\*4.556 ph15

p6\*3.222 ph13

p6\*3.167 ph15

p6\*0.333 ph13

p6\*2.722 ph15

p6\*4.167 ph13

p6\*2.944 ph15

p6\*4.111 ph13

p6\*3.556 ph15

p6\*4.556 ph13

p6\*3.222 ph15

p6\*3.167 ph13

p6\*0.333 ph15

p6\*2.722 ph13

p6\*4.167 ph15

p6\*2.944 ph13

p6\*4.111 ph15

p6\*3.556 ph15

p6\*4.556 ph13

p6\*3.222 ph15

p6\*3.167 ph13

p6\*0.333 ph15

p6\*2.722 ph13

p6\*4.167 ph15

p6\*2.944 ph13

p6\*4.111 ph15

p6\*3.556 ph13

p6\*4.556 ph15

p6\*3.222 ph13

p6\*3.167 ph15

p6\*0.333 ph13

p6\*2.722 ph15

p6\*4.167 ph13

p6\*2.944 ph15

p6\*4.111 ph13

lo to 14 times l1

;end DIPSI2

50u pl1:f1

p1 ph16

DELTA9

p2 ph8

4u

p16:gp14

d16

4u BLKGRAD

go=2 ph18

d11 wr #0 if #0 zd igrad EA

1m ip6\*2

1m ip12\*2

1m ip14\*2

1m ip23\*2

1m ip25\*2

1m ip26\*2

1m ip31\*2

1m ip18\*2

lo to 3 times 2

1m rp6

1m rp12

1m rp14

1m rp23

1m rp25

1m rp26

1m rp31

1m rp18

1m id0

1m id10

lo to 4 times l0

exit

ph1=0

ph2=1

ph4=0 2

ph5=0 0 2 2

ph6=1 1 3 3

ph7=0

ph8=0

ph9=0 0 0 0 2 2 2 2

ph10=0 0 0 0 0 0 0 0 2 2 2 2 2 2 2 2

ph11=0

ph30=0 2 2 0 2 0 0 2 2 0 0 2 0 2 2 0

ph21=0

ph22=1

ph23=0 2

ph24=0 0 2 2

ph25=1 1 3 3

ph26=0

ph27=0 0 2 2

ph31=2 0 0 2

ph12=0 2

ph14=0 0 2 2

ph13=3

ph15=1

ph16=2 2 0 0

ph19=0

ph18=0 2

;p10 : 0W

;p11 : f1 channel - power level for pulse (default)

;p12 : f2 channel - power level for pulse (default)

;p12: f2 channel - power level for CPD/BB decoupling

;sp3: f2 channel - shaped pulse (180degree inversion)

;spnam3: Crp80,0.5,20.1

;spnam1: Crp80,20,20.10

;sp7: f2 channel - shaped pulse (180degree refocussing)

;spnam7: Crp80comp.4

;p0 : f2 channel - 120 degree high power pulse

;p1 : f1 channel - 90 degree high power pulse

;p2 : f1 channel - 180 degree high power pulse

;p3 : f2 channel - 90 degree high power pulse

;p14: f2 channel - 180 degree shaped pulse for inversion

; = 500usec for Crp60,0.5,20.1

;p16: homospoil/gradient pulse

; = 1msec

```

;p17: homospoil/gradient pulse
;
; = 1msec
;p20: PSYCHE gradient pulse
;
; = 30msec
;p24: f2 channel - 180 degree shaped pulse for refocussing
; = 2msec for Crp60comp.4
;d0 : incremented delay (2D) (for adequate) [3 usec]
;d20 : incremented delay (2D) (for HSQC)
;d0 : incremented delay (2D) (for TOCSY)
;d1 : relaxation delay; 1-5 * T1
;d4 : 1/4J(CH)
;d11: delay for disk I/O [30 msec]
;d16: delay for homospoil/gradient recovery
;d23: 1/(4J(CC))
;d9: TOCSY mixing period
;d19: ASAP-TOCSY mixing period (for HSQC ~ 40 msec)
;d24: 1/(4J(CH)) for CH
; 1/(8J(CH)) for all multiplicities
;cnst2 : J(CH) = 127 .. 160 Hz
;cnst3 : J(CC) = 35 .. 55 Hz
;cnst11: for multiplicity selection = 4 for CH, 8 for CHn
;cnst17: = -0.5 for Crp60comp.4
;cnst20: = low flip angle pulse 10-25 degree
;inf1: 1/SW(C) = 2 * DW(C)
;in0: 1/(2 * SW(C)) = DW(C)

```

```
;nd0: 2
;in20: = in0
;ns: 16 * n
;ds: >= 16
;td1: number of experiments
;FnMODE: echo-antiecho
;cpd2:[bi_p5m4sp_4sp.2] decoupling according to sequence defined by cpdprg2
;pcpd2: f2 channel - 90 degree pulse for decoupling sequence
;cnst10: = scaling factor swC/swH for TOCSY
;p63: f2 channel - decoupler pulse length [1.5 msec]
;   = 1500usec for bi_p5m4sp_4sp.2.
```

```
;for z-only gradients:
```

```
;gpz1: +78.5%
;gpz2: +77.6%
;gpz3: -59%
;gpz4: +80.0%
;gpz5: +20.1%
;gpz10: +1.0%
;gpz11: +49%
;gpz12: 77%
;gpz13: 30%
;gpz14: 30%
;gpz22: 17%
```

```
;use gradient files:
```

```
;gpnam1: SMSQ10.100
```

```
;gpnam2: SMSQ10.100
```

```
;gpnam3: SMSQ10.100
```

```
;gpnam4: SMSQ10.100
```

```
;gpnam5: SMSQ10.100
```

```
;gpnam10: RECT.1
```

```
;gpnam11: SMSQ10.100
```

```
;gpnam12: SMSQ10.100
```

```
;gpnam13: SMSQ10.100
```

```
;gpnam14: SMSQ10.100
```

```
;gpnam21: SMSQ10.100
```

```
;cnst17: Factor to compensate for coupling evolution during a pulse
```

```
; (usually +1). A positive factor indicates that coupling
```

```
; evolution continues during the pulse, whereas a negative
```

```
; factor is necessary if the coupling is (partially) refocussed.
```

```
""""
```

```
import math
```

```
pp = DEF_PULSPROG(PPTXT)
```

```
ppName = "noah3_AST"
```

```
PUTPAR("PULPROG", ppName)
```



pp.SAVE\_AS(ppName)

PUTPAR("1 FnMODE", "Echo-Antiecho")

PUTPAR("GPNAM 1", "SMSQ10.100")

PUTPAR("GPZ 1", "78.5")

PUTPAR("GPNAM 2", "SMSQ10.100")

PUTPAR("GPZ 2", "77.6")

PUTPAR("GPNAM 3", "SMSQ10.100")

PUTPAR("GPZ 3", "-59.0")

PUTPAR("GPNAM 4", "SMSQ10.100")

PUTPAR("GPZ 4", "80.0")

PUTPAR("GPNAM 5", "SMSQ10.100")

PUTPAR("GPZ 5", "20.1")

PUTPAR("GPNAM 13", "SMSQ10.100")

PUTPAR("GPZ 13", "30.0")

PUTPAR("GPNAM 14", "SMSQ10.100")

PUTPAR("GPZ 14", "30.0")

PUTPAR("GPNAM 22", "SMSQ10.100")

PUTPAR("GPZ 22", "17.0")

PUTPAR("SPNAM 3", "Crp80,0.5,20.1")

PUTPAR("SPNAM 1", "Crp80,20,20.10")

PUTPAR("SPNAM 7", "Crp80comp.4")

PUTPAR("CPDPRG 2", "bi\_p5m4sp\_4sp.2")

```
PUTPAR("NBL", "3")
PUTPAR("NS", "32")
PUTPAR("DS", "32")
PUTPAR("TD", "1024")
PUTPAR("1 TD", "512")
PUTPAR("D 1", "1")
PUTPAR("D 9", "0.08")
```

```
ct = XCMD("SWH")
```

```
ct.join()
```

```
ct = XCMD("O1")
```

```
ct.join()
```

```
ct = XCMD("D1")
```

```
ct.join()
```

```
ct = XCMD("NS")
```

```
ct.join()
```

```
ct = XCMD("DS")
```

```
ct.join()
```

```
ct = XCMD("TD")
```

```
ct.join()
```

```
aqdirect = GETPAR ("AQ")
```

```
MSG(str(aqdirect)+ "= Proton Acquisition time"+ "\nShould be <= 50 ms")
```

```
td1 = GETPAR("1 TD")
```

```
MSG(str(td1)+ "\nNumber of indirect increments" "\nBy default it takes 512 increments \nIn the AST experiments it shows 1536 for the three pulse blocks")
```

```
ct = XCMD("D9")
```

```
ct.join()
```

```
td11 = int (td1)
```

```
td111 = 3*td11
```

```
PUTPAR("1 TD", str(td111))
```

```
a = GETPAR("SWH")
```

```
aa = 1.0 / float (a)
```

```
b = GETPAR("1 SWH")
```

```
bb = float (b)
```

```
c = aa * bb
```

```
PUTPAR("CNST 10", str(c))
```

```
p = GETPAR("P 1")
```

```
pf = str (p)
```

```
pk = GETPAR("PLdB 1")
```

```
pkf = str (pk)
```

```
XCMD ("2 WDW QSINE")
```

```
XCMD ("1 WDW QSINE")
```

```
XCMD ("1 SSB 2")
```

```
XCMD ("2 SSB 2")
```

```
XCMD ("2 PH_mod pk")
```

```
XCMD ("1 PH_mod pk")
```

XCMD ("1 MC2 echo-antiecho")

XCMD ("1 USERP1 noah\_hsqc")

XCMD ("1 USERP2 noah\_hsqc")

XCMD ("1 USERP3 noah\_noesy")

MSG("Perform with the known P1 and PLdB1" "\ngetprosol 1H P1 PLdB1")

# Noah\_ast\_psyche.py script

## save the following script as noah-ast\_psyche.py

MSG("Initial step: 1D 1H and 13C experiments have to be recorded" "\nThen create a new data set with the command \a'new'" "\nThe present macro 'AST' takes care all the required parameters")

```
ct = XCMD("RPAR HMBCGP all")
```

MSG("DRAG 1D 1H data set into the present window" "\nClick on Copy Parameters Option" "\nClick on OK")

```
ct = XCMD("copypars.py")
```

MSG("DRAG 1D 13C data set into the present window" "\nClick on Copy Parameters Option" "\nClick on OK")

```
ct = XCMD("copypars.py")
```

```
PPTXT = ""
```

```
;$CLASS=HighRes
```

```
;$DIM=2D
```

```
;$TYPE=
```

```
;$SUBTYPE=
```

```
;$COMMENT=
```

```
#include <Avance.incl>
```

```
#include <Delay.incl>
```

```
#include <Grad.incl>
```

```
"p2=p1*2"
```

```
"d0=3u"
```

```
"d10=3u"
```

```
"d11=30m"
```

```
"d16=200u"
```

```
"d17=200u"
```

```
"p28=0u"
```

```
"p14=500u"
```

```
"p24=2000u"
```

```
"p63=1500u"
```

```
"p16=1000u"
```

```
"p17=1000u"
```

```
"p6=25u"
```

```
"cnst2=145"
```

```
"cnst3=45"
```

```
"cnst11=8"
```

```
"cnst17=-0.5"
```

```
"p0=p3*1.333"
```

"d4=1s/(cnst2\*4)"

"d23=1s/(cnst3\*4)"

"d24=1s/(cnst2\*cnst11)"

"in0=inf1/2"

"DELTA1=p16+d16-p2-d0\*2+4u"

"DELTA2=p16+d16+8u"

"DELTA3=p16+d16+p2+d0\*2-4u"

"DELTA4=d4-p14/2-4u"

"DELTA5=d23-p24/2-4u"

"DELTA6=d24-cnst17\*p24/2-4u"

"p4=p3\*2"

"d21=0.003448000s"

"DELTA10=d21-cnst17\*p24/2-p16-d16-p2-d0\*2"

"DELTA11=p16+d16-p1\*0.78+de+8u"

"DELTA12=d4-larger(p2,p14)/2"

"DELTA13=d21-cnst17\*p24/2-4u"

"DELTA14=d24-cnst17\*p24/2-4u"

"l0=td1/6"

"FACTOR1=(d9/(p6\*115.112))/2"

"l1=FACTOR1\*2"

"in10=0.5\*inf1\*cnst10"

"p11=20m"

"cnst21=10000"

"cnst50=(cnst20/360)\*sqrt((2\*cnst21)/(p10/2000000))"

"p30=1000000.0/(cnst50\*4)"

"cnst31= (p30/p1) \* (p30/p1)"

"spw37=plw1/cnst31"

"p10=30m"

"DELTA8=p16+d16+d0"

"DELTA9=p16+d16+8u"

"acqt0=0"

baseopt\_echo

1 ze

d11 pl12:f2

2 d11

3 4m do:f2



4 50u UNBLKGRAD

d1 st0

4u pl2:f2

4u pl1:f1

4u pl2:f2

(p3 ph1):f2

p16:gp22

d16

13 (p1 ph1)

4u

DELTA4 pl0:f2

(center (p2 ph1) (p14:sp3 ph1):f2 )

4u

DELTA4 pl2:f2

(p1 ph2) (p3 ph4):f2

4u

DELTA5 pl0:f2

(p24:sp7 ph8):f2

4u

DELTA5 pl2:f2

(p3 ph9):f2

d0

(p2 ph1)

d0

DELTA1 pl0:f2 UNBLKGRAD

(p24:sp7 ph11):f2

4u

p16:gp1

d16 pl2:f2

(p0 ph10):f2

4u

DELTA3 pl0:f2

(p24:sp7 ph11):f2

p16:gp2

d16 pl2:f2

d0

(p2 ph1)

d0

(center (p1 ph1) (p3 ph5):f2 )

4u

DELTA6 pl0:f2

(center (p2 ph1) (p24:sp7 ph1):f2 )

4u

DELTA6 pl2:f2

(center (p1 ph2) (p3 ph6):f2 )

4u

DELTA4 pl0:f2

(center (p2 ph1) (p14:sp3 ph1):f2 )

4u

DELTA4

(p1 ph1)

DELTA2

(p2 ph1)

4u

p16:gp3\*EA

d16 pl12:f2

4u BLKGRAD

goscnp ph30 cpd2:f2

4u do:f2

2m st

50u UNBLKGRAD

4u pl2:f2

4u pl1:f1

(p3 ph1):f2

p16:gp22

d16

23 (p1 ph21)

DELTA12 pl0:f2

4u

(center (p2 ph21) (p14:sp3 ph26):f2 )

4u

DELTA12 pl2:f2 UNBLKGRAD

p28 ph21

4u

(p1 ph22) (p3 ph23):f2

d0

(p2 ph27)

d0

p16:gp4\*EA

d16

DELTA10 pl0:f2

(center (p2 ph21) (p24:sp7 ph24):f2 )

4u

DELTA13 pl2:f2

(center (p1 ph21) (p3 ph24):f2 )

4u

DELTA14 pl0:f2

(center (p2 ph21) (p24:sp7 ph21):f2 )

4u

DELTA14 pl2:f2

(center (p1 ph22) (p3 ph25):f2 )

DELTA12 pl0:f2

(center (p2 ph21) (p14:sp3 ph21):f2 )

DELTA12

(p1 ph21)

DELTA11

(p2 ph21)

4u

p16:gp5

d16 pl12:f2

4u BLKGRAD

goscnp ph31 cpd2:f2

4u do:f2

2m st

4u pl2:f2

(p3 ph1):f2

50u UNBLKGRAD

p16:gp22

d16

4u pl1:f1

p1 ph12

DELTA8

p2 ph8

d10

50u UNBLKGRAD

p16:gp11

d16

p2 ph8

50u

p16:gp11

d16

p17:gp12

d17

10u pl0:f1

d16

(center (p10:gp10) (p10:sp37 ph8):f1 )

d16

10u pl1:f1

p17:gp12

d17

d10

p16:gp13\*EA

d16

p1 ph14

10u pl10:f1

;begin DIPSI2

14 p6\*3.556 ph13

p6\*4.556 ph15

p6\*3.222 ph13

p6\*3.167 ph15

p6\*0.333 ph13

p6\*2.722 ph15

p6\*4.167 ph13

p6\*2.944 ph15

p6\*4.111 ph13

p6\*3.556 ph15

p6\*4.556 ph13

p6\*3.222 ph15

p6\*3.167 ph13

p6\*0.333 ph15

p6\*2.722 ph13

p6\*4.167 ph15

p6\*2.944 ph13

p6\*4.111 ph15

p6\*3.556 ph15

p6\*4.556 ph13

p6\*3.222 ph15

p6\*3.167 ph13

p6\*0.333 ph15

p6\*2.722 ph13

p6\*4.167 ph15

p6\*2.944 ph13

p6\*4.111 ph15

p6\*3.556 ph13

p6\*4.556 ph15

p6\*3.222 ph13

p6\*3.167 ph15

p6\*0.333 ph13

p6\*2.722 ph15

p6\*4.167 ph13

p6\*2.944 ph15

p6\*4.111 ph13

lo to 14 times l1

;end DIPSI2

50u pl1:f1

p1 ph16

DELTA9

p2 ph8

4u

p16:gp14

d16

4u BLKGRAD

go=2 ph18



d11 wr #0 if #0 zd igrad EA

1m ip6\*2

1m ip12\*2

1m ip14\*2

1m ip23\*2

1m ip25\*2

1m ip26\*2

1m ip31\*2

1m ip18\*2

lo to 3 times 2

1m rp6

1m rp12

1m rp14

1m rp23

1m rp25

1m rp26

1m rp31

1m rp18

1m id0

1m id10

lo to 4 times I0

exit

ph1=0

ph2=1

ph4=0 2

ph5=0 0 2 2

ph6=1 1 3 3

ph7=0

ph8=0

ph9=0 0 0 0 2 2 2 2

ph10=0 0 0 0 0 0 0 0 2 2 2 2 2 2 2 2

ph11=0

ph30=0 2 2 0 2 0 0 2 2 0 0 2 0 2 2 0

ph21=0

ph22=1

ph23=0 2

ph24=0 0 2 2

ph25=1 1 3 3

ph26=0

ph27=0 0 2 2

ph31=2 0 0 2

ph12=0 2

ph14=0 0 2 2

ph13=3

ph15=1

ph16=2 2 0 0

ph19=0

ph18=0 2

;p0 : 0W

;p1 : f1 channel - power level for pulse (default)

;p2 : f2 channel - power level for pulse (default)

;p12: f2 channel - power level for CPD/BB decoupling

;sp3: f2 channel - shaped pulse (180degree inversion)

;spnam3: Crp80,0.5,20.1

;spnam1: Crp60,20,20.10

;spnam37: Crp\_psyche.20

;sp7: f2 channel - shaped pulse (180degree refocussing)

;spnam7: Crp80comp.4

;p0 : f2 channel - 120 degree high power pulse

;p1 : f1 channel - 90 degree high power pulse

;p2 : f1 channel - 180 degree high power pulse

;p3 : f2 channel - 90 degree high power pulse

;p14: f2 channel - 180 degree shaped pulse for inversion

; = 500usec for Crp60,0.5,20.1

;p16: homospoil/gradient pulse

; = 1msec

;p17: homospoil/gradient pulse

```

;                               = 1msec
;p20: PSYCHE gradient pulse
;                               = 30msec
;p24: f2 channel - 180 degree shaped pulse for refocussing
;   = 2msec for Crp60comp.4
;d0 : incremented delay (2D) (for adequate)           [3 usec]
;d20 : incremented delay (2D) (for HSQC)
;d0 : incremented delay (2D) (for TOCSY)
;d1 : relaxation delay; 1-5 * T1
;d4 : 1/4J(CH)
;d11: delay for disk I/O           [30 msec]
;d16: delay for homospoil/gradient recovery
;d23: 1/(4J(CC))
;d9: TOCSY mixing period
;d19: ASAP-TOCSY mixing period (for HSQC ~ 40 msec)
;d24: 1/(4J(CH)) for CH
;   1/(8J(CH)) for all multiplicities
;cnst2 : J(CH) = 127 .. 160 Hz
;cnst3 : J(CC) = 35 .. 55 Hz
;cnst11: for multiplicity selection = 4 for CH, 8 for CHn
;cnst17: = -0.5 for Crp60comp.4
;cnst20: = low flip angle pulse 10-25 degree
;inf1: 1/SW(C) = 2 * DW(C)
;in0: 1/(2 * SW(C)) = DW(C)
;nd0: 2

```

```
;in20: = in0
;ns: 16 * n
;ds: >= 16
;td1: number of experiments
;FnMODE: echo-antiecho
;cpd2:[bi_p5m4sp_4sp.2] decoupling according to sequence defined by cpdprg2
;pcpd2: f2 channel - 90 degree pulse for decoupling sequence
;cnst10: = scaling factor swC/swH for TOCSY
;p63: f2 channel - decoupler pulse length [1.5 msec]
;   = 1500usec for bi_p5m4sp_4sp.2.
```

```
;for z-only gradients:
```

```
;gpz1: +78.5%
```

```
;gpz2: +77.6%
```

```
;gpz3: -59%
```

```
;gpz4: +80.0%
```

```
;gpz5: +20.1%
```

```
;gpz10: +1.0-3.0%
```

```
;gpz11: +49%
```

```
;gpz12: 77%
```

```
;gpz13: 30%
```

```
;gpz14: 30%
```

```
;gpz22: 17%
```

```
;use gradient files:
```

```
;gpnam1: SMSQ10.100
```

```
;gpnam2: SMSQ10.100
```

```
;gpnam3: SMSQ10.100
```

```
;gpnam4: SMSQ10.100
```

```
;gpnam5: SMSQ10.100
```

```
;gpnam10: RECT.1
```

```
;gpnam11: SMSQ10.100
```

```
;gpnam12: SMSQ10.100
```

```
;gpnam13: SMSQ10.100
```

```
;gpnam14: SMSQ10.100
```

```
;gpnam21: SMSQ10.100
```

```
;cnst17: Factor to compensate for coupling evolution during a pulse
```

```
; (usually +1). A positive factor indicates that coupling
```

```
; evolution continues during the pulse, whereas a negative
```

```
; factor is necessary if the coupling is (partially) refocussed.
```

```
""""
```

```
import math
```

```
pp = DEF_PULSPROG(PPTXT)
```

```
ppName = "noah3_AST_psyche"
```

```
PUTPAR("PULPROG", ppName)
```

```
pp.SAVE_AS(ppName)
```

PUTPAR("1 FnMODE", "Echo-Antiecho")  
PUTPAR("GPNAM 1", "SMSQ10.100")  
PUTPAR("GPZ 1", "78.5")  
PUTPAR("GPNAM 2", "SMSQ10.100")  
PUTPAR("GPZ 2", "77.6")  
PUTPAR("GPNAM 3", "SMSQ10.100")  
PUTPAR("GPZ 3", "-59.0")  
PUTPAR("GPNAM 4", "SMSQ10.100")  
PUTPAR("GPZ 4", "80.0")  
PUTPAR("GPNAM 5", "SMSQ10.100")  
PUTPAR("GPZ 5", "20.1")  
PUTPAR("GPNAM 13", "SMSQ10.100")  
PUTPAR("GPZ 13", "30.0")  
PUTPAR("GPNAM 14", "SMSQ10.100")  
PUTPAR("GPZ 14", "30.0")  
PUTPAR("GPNAM 22", "SMSQ10.100")  
PUTPAR("GPZ 22", "17.0")  
PUTPAR("GPNAM 10", "RECT.1")  
PUTPAR("GPZ 10", "3.0")  
PUTPAR("GPNAM 11", "SMSQ10.100")  
PUTPAR("GPZ 11", "49.0")  
PUTPAR("GPNAM 12", "SMSQ10.100")  
PUTPAR("GPZ 12", "77.0")

PUTPAR("SPNAM 3", "Crp80,0.5,20.1")

PUTPAR("SPNAM 1", "Crp80,20,20.10")

PUTPAR("SPNAM 37", "Crp\_psyche.20")

PUTPAR("SPNAM 7", "Crp80comp.4")

PUTPAR("CPDPRG 2", "bi\_p5m4sp\_4sp.2")

PUTPAR("NBL", "3")

PUTPAR("NS", "32")

PUTPAR("DS", "32")

PUTPAR("TD", "1024")

PUTPAR("1 TD", "512")

PUTPAR("D 1", "1")

PUTPAR("D 9", "0.08")

PUTPAR("CNST 20", "15")

ct = XCMD("SWH")

ct.join()

ct = XCMD("O1")

ct.join()

ct = XCMD("D1")

ct.join()

ct = XCMD("NS")

ct.join()

ct = XCMD("DS")

ct.join()



```
ct = XCMD("TD")
```

```
ct.join()
```

```
aqdirect = GETPAR ("AQ")
```

```
MSG(str(aqdirect)+ "= Proton Acquisition time"+ "\nShould be <= 50 ms")
```

```
td1 = GETPAR("1 TD")
```

```
MSG(str(td1)+ "\nNumber of indirect increments" "\nBy default it takes 512 increments \nIn the AST experiments it shows 1536 for the three pulse blocks")
```

```
ct = XCMD("D9")
```

```
ct.join()
```

```
td11 = int (td1)
```

```
td111 = 3*td11
```

```
PUTPAR("1 TD", str(td111))
```

```
a = GETPAR("SWH")
```

```
aa = 1.0 / float (a)
```

```
b = GETPAR("1 SWH")
```

```
bb = float (b)
```

```
c = aa * bb
```

```
PUTPAR("CNST 10", str(c))
```

```
p = GETPAR("P 1")
```

```
pf = str (p)
```

```
pk = GETPAR("PLdB 1")
```

```
pkf = str (pk)
```

XCMD ("2 WDW QSINE")

XCMD ("1 WDW QSINE")

XCMD ("1 SSB 2")

XCMD ("2 SSB 2")

XCMD ("2 PH\_mod pk")

XCMD ("1 PH\_mod pk")

XCMD ("1 MC2 echo-antiecho")

XCMD ("USERP1 noah\_hsqc")

XCMD ("USERP2 noah\_hsqc")

XCMD ("USERP3 noah\_noesy")

MSG("Perform with the known P1 and PLdB1" "\ngetprosol 1H P1 PLdB1")
